# Supplementary material
Source: publisher figshare collection journal article supplement (https://acs.figshare.com/ndownloader/files/24363678)
Supplement: Supplementary file 1 [file 24363678]

---

## **Supporting Information**

# Mesoporous 3D/2D NiCoP/g-C<sub>3</sub>N<sub>4</sub> heterostructure with dual Co-N and Ni-N bonding states for boosting photocatalytic H<sub>2</sub> production activity and stability

Chunmei Li<sup>a</sup>, Huihui Wu<sup>a</sup>, Yonghua Du<sup>b</sup>, Shibo Xi<sup>c</sup>, Hongjun Dong<sup>a</sup>, Shuhao Wang<sup>a</sup>, Yun Wang<sup>a,\*</sup>

<sup>a</sup>*Institute of Green Chemistry and Chemical Technology, School of Chemistry and Chemical Engineering, Jiangsu University, Zhenjiang, 212013, P. R. China*

<sup>b</sup>*National Synchrotron Light Source II, Brookhaven National Lab, Upton, NY, 11973, USA.*

<sup>c</sup>*Institute of Chemical and Engineering Sciences 1 Pesek Road, Jurong Island, 627833, Singapore.*

Corresponding author: [yunwang@ujs.edu.cn](mailto:yunwang@ujs.edu.cn)

Number of pages: 2

Number of figures: 2

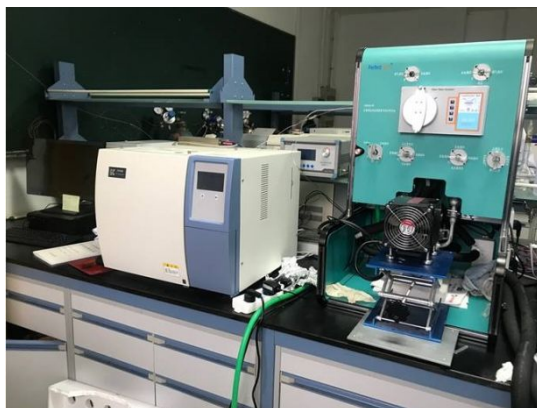

**Fig. S1** The full glass automatic on-line trace gas analysis system (Labsolar-6A) from Beijing Perfectlight Technology Co., Ltd.

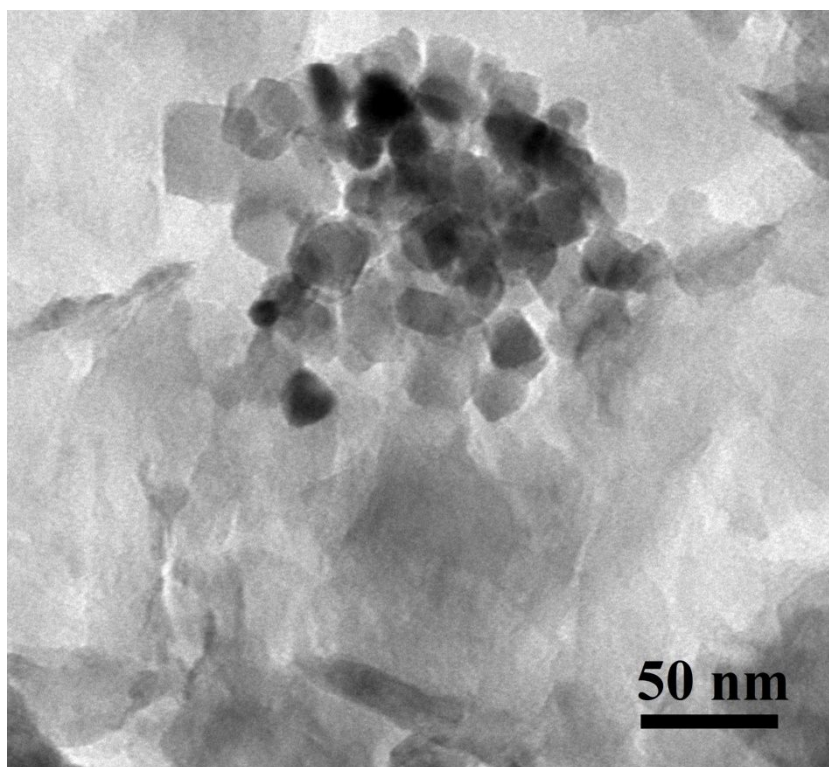

**Fig. S2** TEM image of NiCoP/g-C<sub>3</sub>N<sub>4</sub>-3 sample before and after photocatalytic reaction
